# Supplementary material for: Recognition of 8-Oxo-2′-deoxyguanosine in DNA Using the Triphosphate of 2′-Deoxycytidine Connecting the 1,3-Diazaphenoxazine Unit, dCdapTP
Source: MDPI journal article supplement (doi:10.3390/molecules29102270), 2024-05-11

Supporting information (SI)

## **Recognition of 8-Oxo-2'-Deoxyguanosine in DNA Using the Triphosphate of 2'-Deoxycytidine Connecting the 1,3-Diazaphenoxazine Unit, dCdapTP**

Takato Sakurada <sup>1</sup>, Yuta Chikada <sup>1,2</sup>, Ryo Miyahara <sup>1</sup> and Yosuke Taniguchi <sup>1,2,\*</sup>

1 Graduate School of Pharmaceutical Sciences, Kyushu University, 3-1-1 Maidashi, Higashi-ku, Fukuoka 812-8582, Japan; takatorres.31@gmail.com (T.S.); chikada.yuta.840@s.kyushu-u.ac.jp (Y.C.); c51339rm@gmail.com (R.M.)

2 Faculty of Medicine, Dentistry and Pharmaceutical Sciences, Okayama University, 1-1-1 Tsushima-naka, Kita-ku, Okayama 700-8530, Japan

\* Correspondence: y-taniguchi@okayama-u.ac.jp; Tel.: +81-86-251-7964

Contents:

|                                                                |     |
|----------------------------------------------------------------|-----|
| 1. NMR spectra of new compounds (1–4, 8, 13–16)                | p2  |
| 2. NMR spectra of corresponding triphosphate compounds (17–20) | p12 |

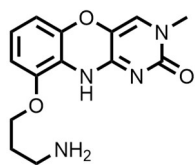

Compound 8

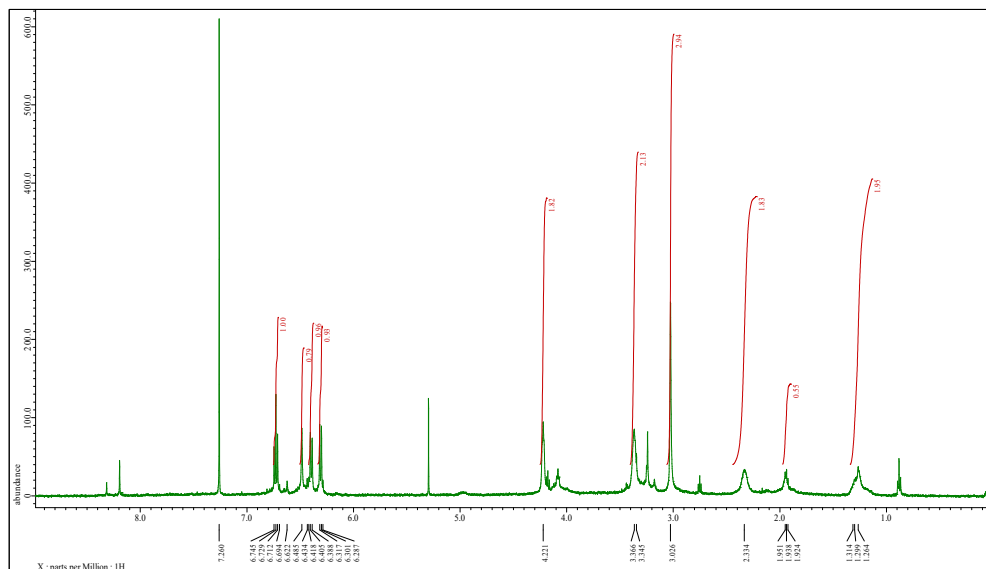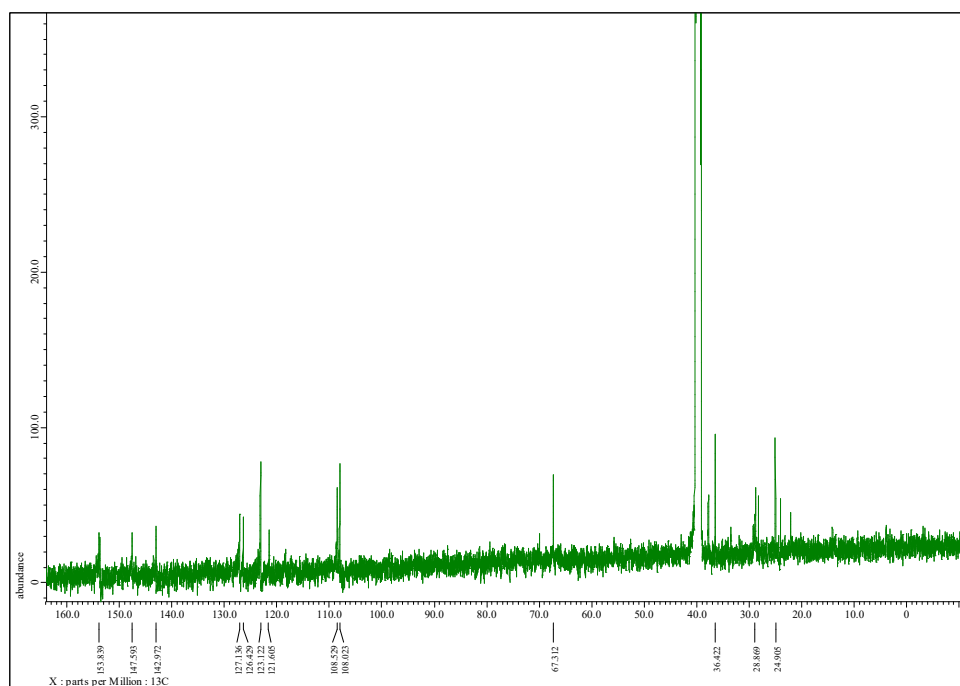

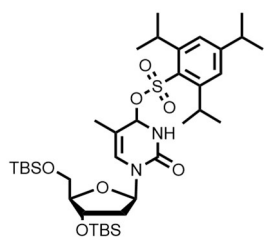

Compound 11

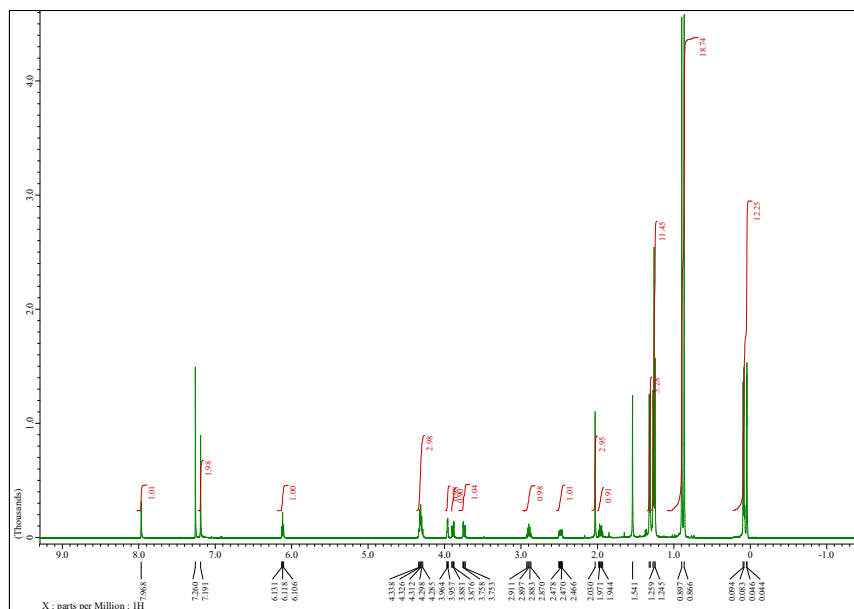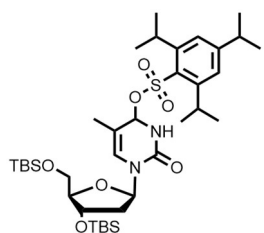

Compound 12

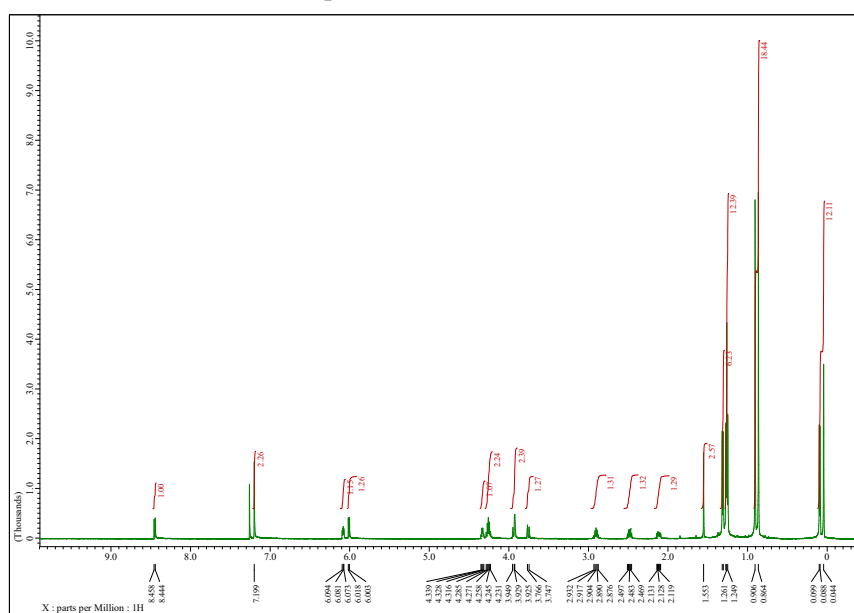

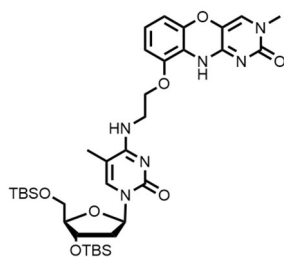

Compound **13**

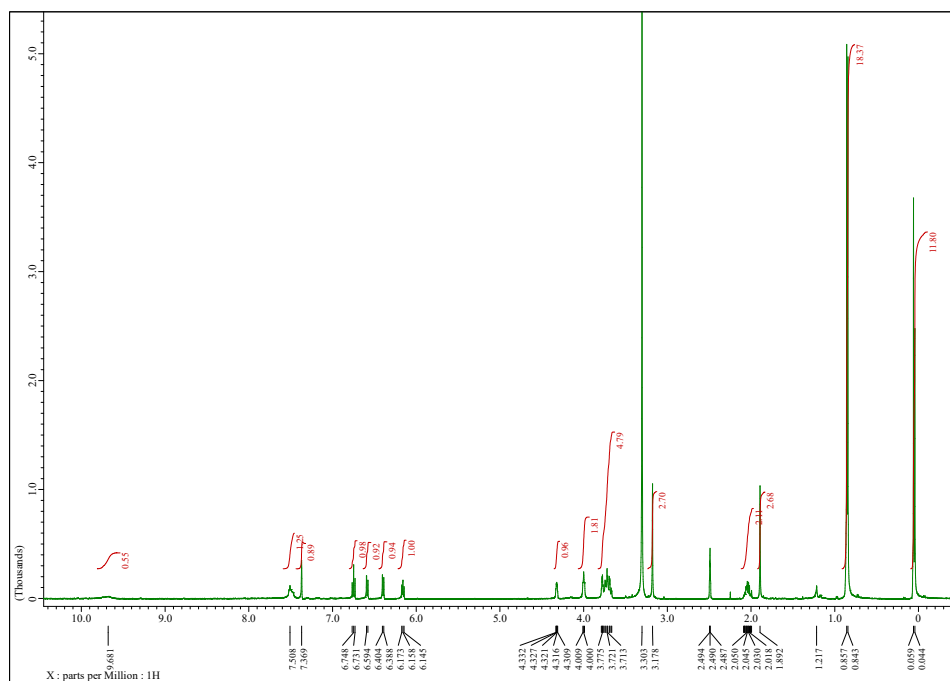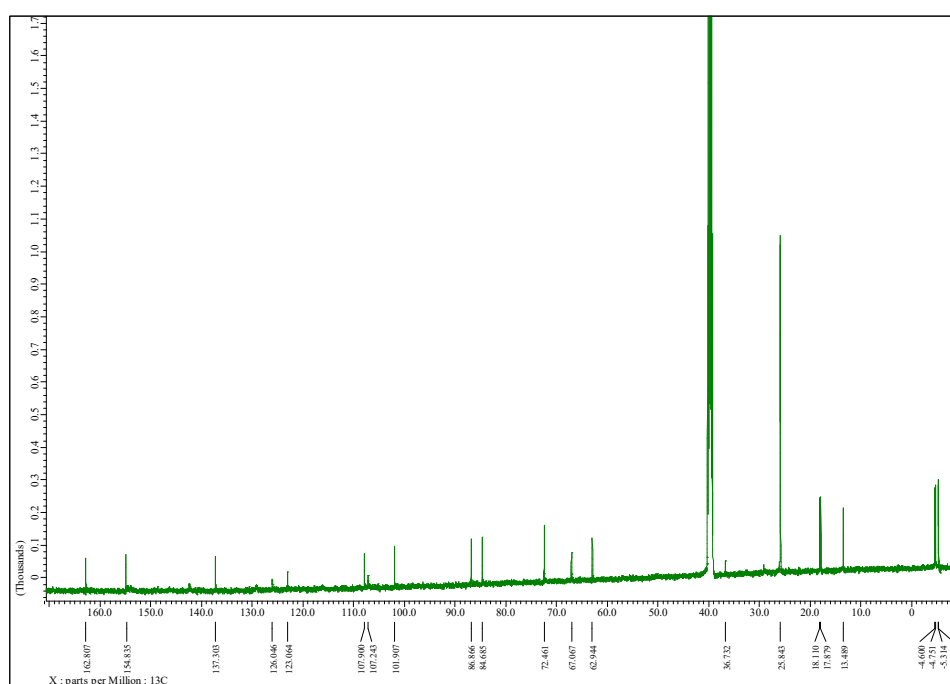

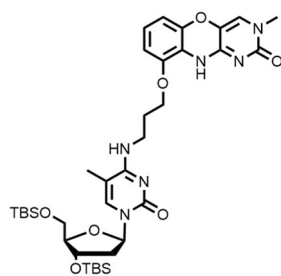

Compound 14

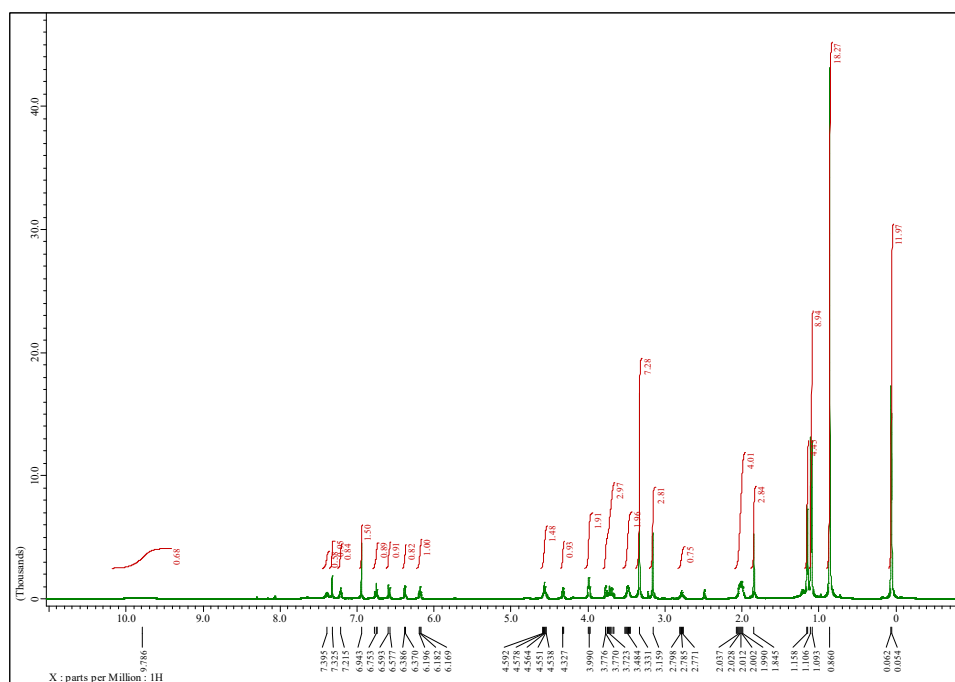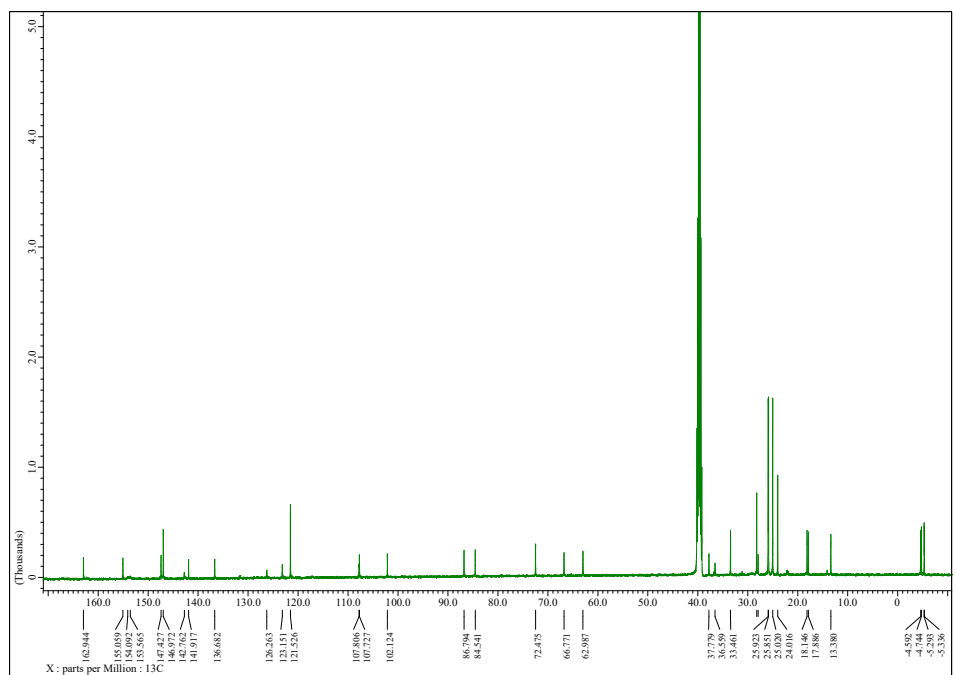

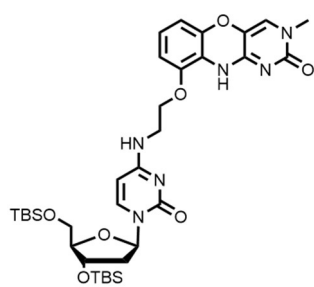

Compound 15

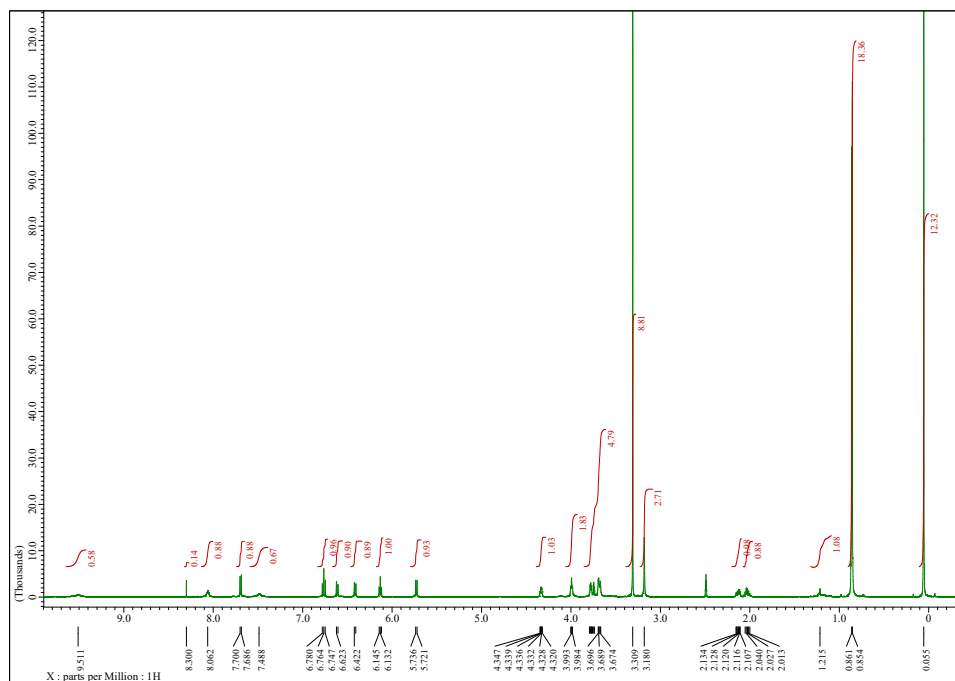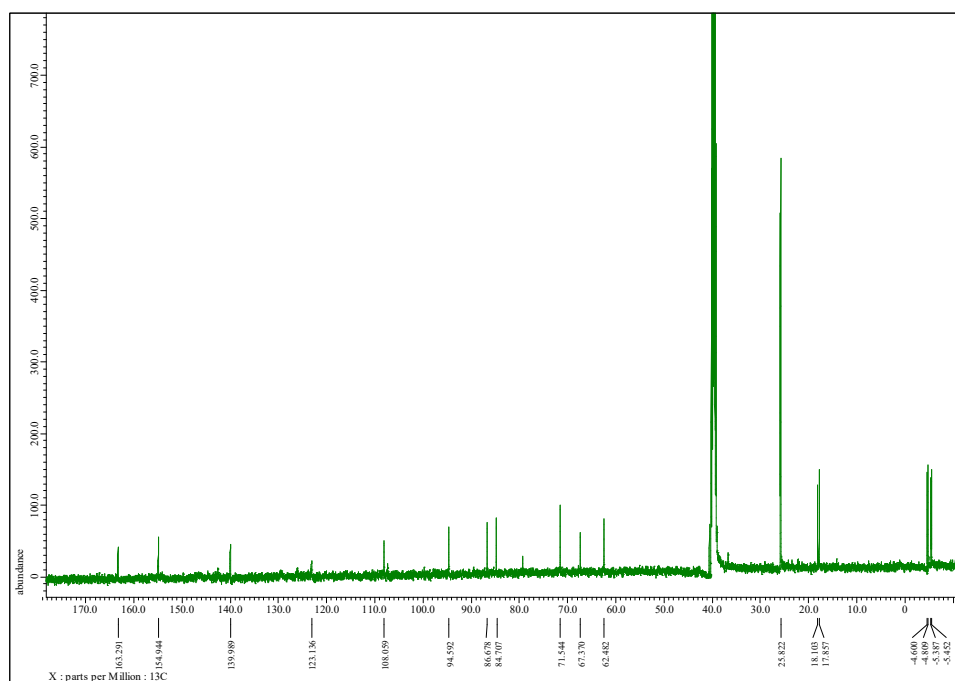

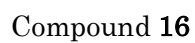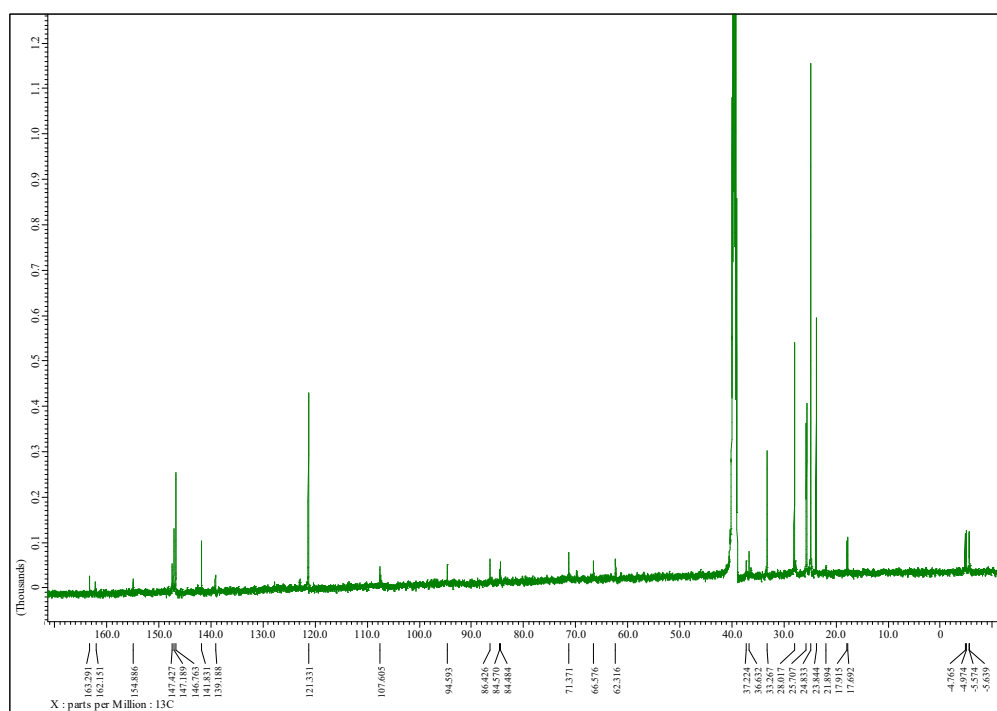

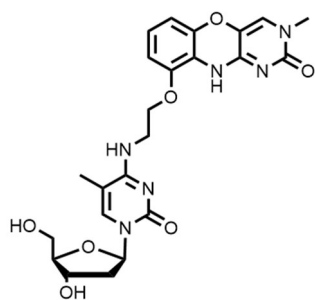

Compound 1

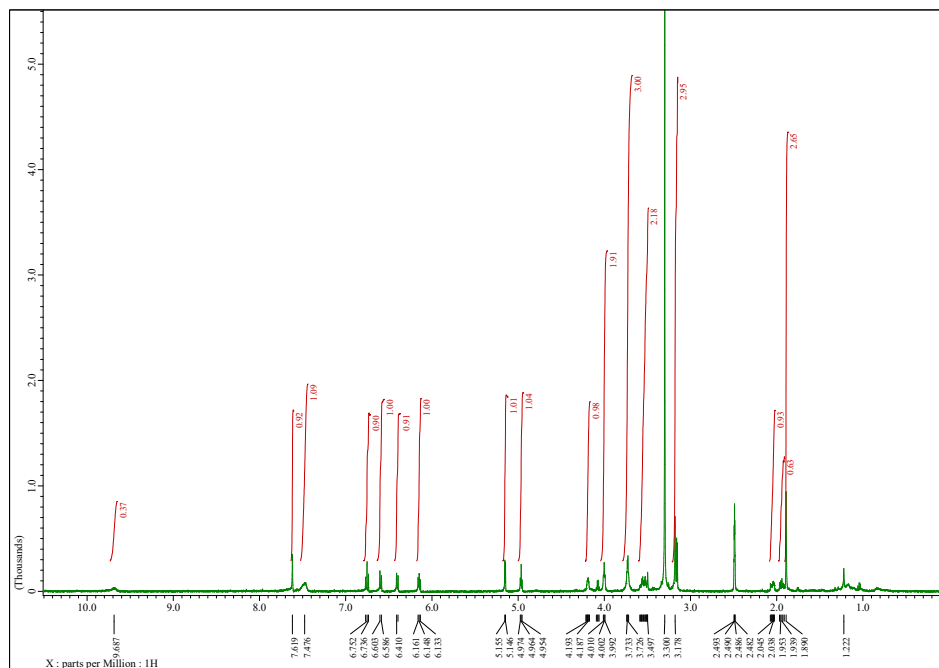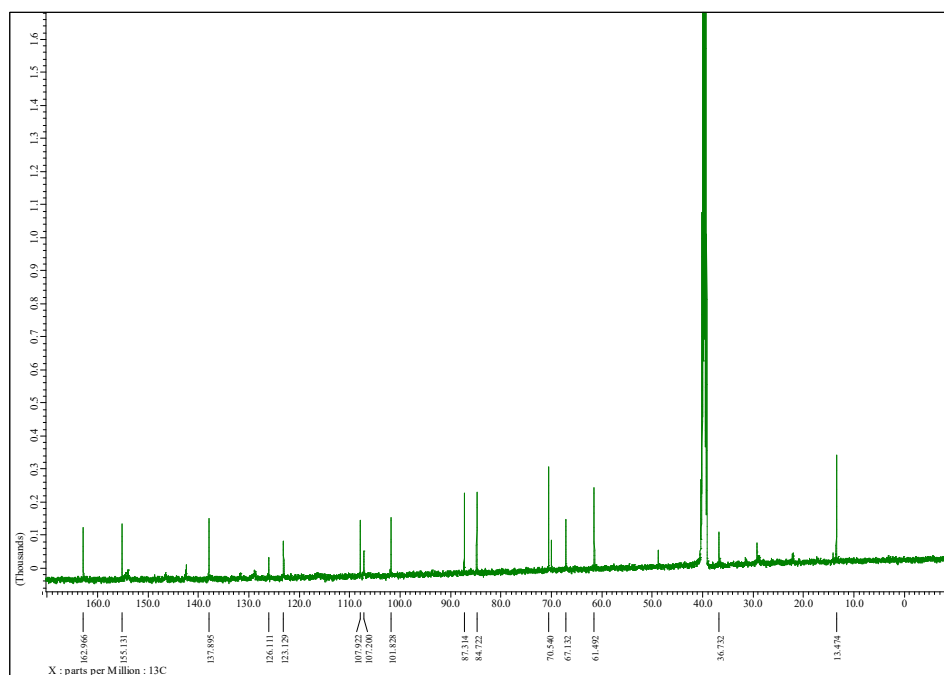



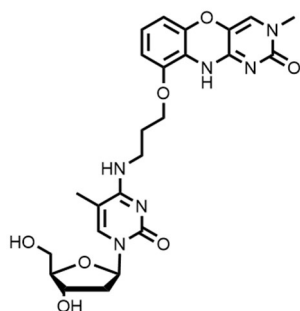

Compound 2

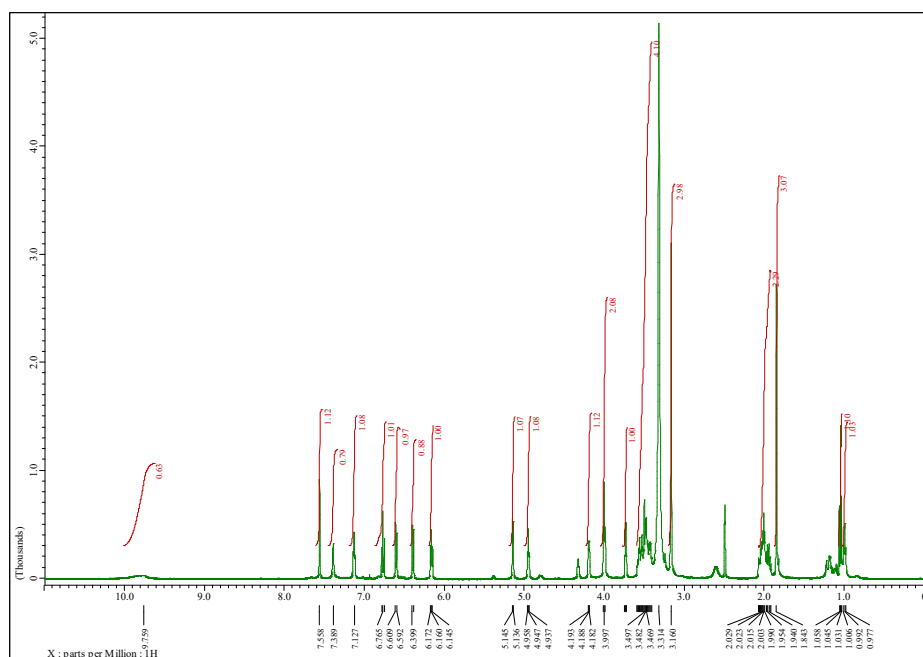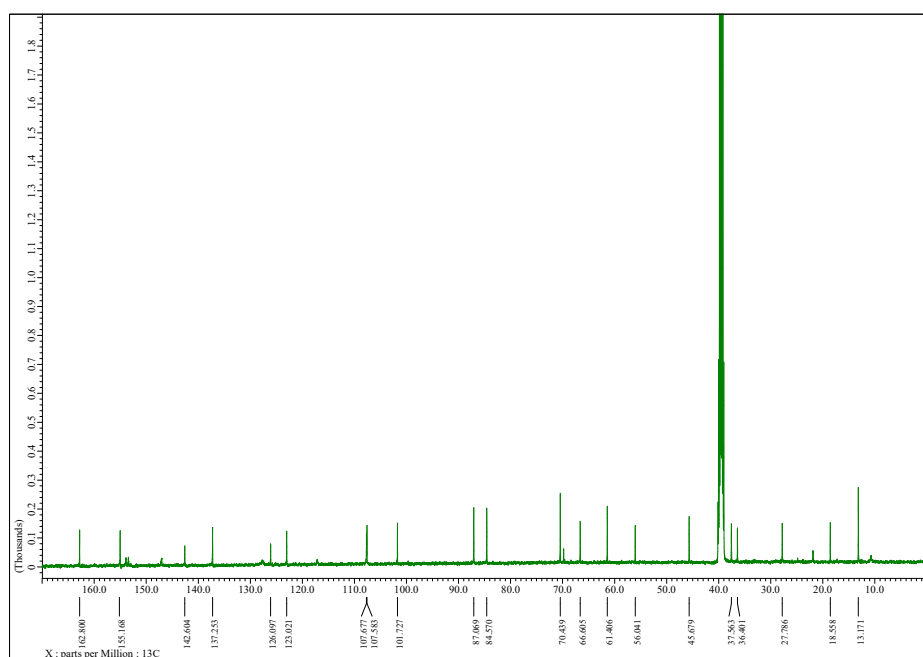

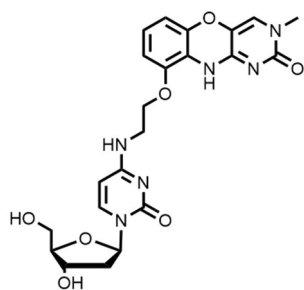

Compound **3**

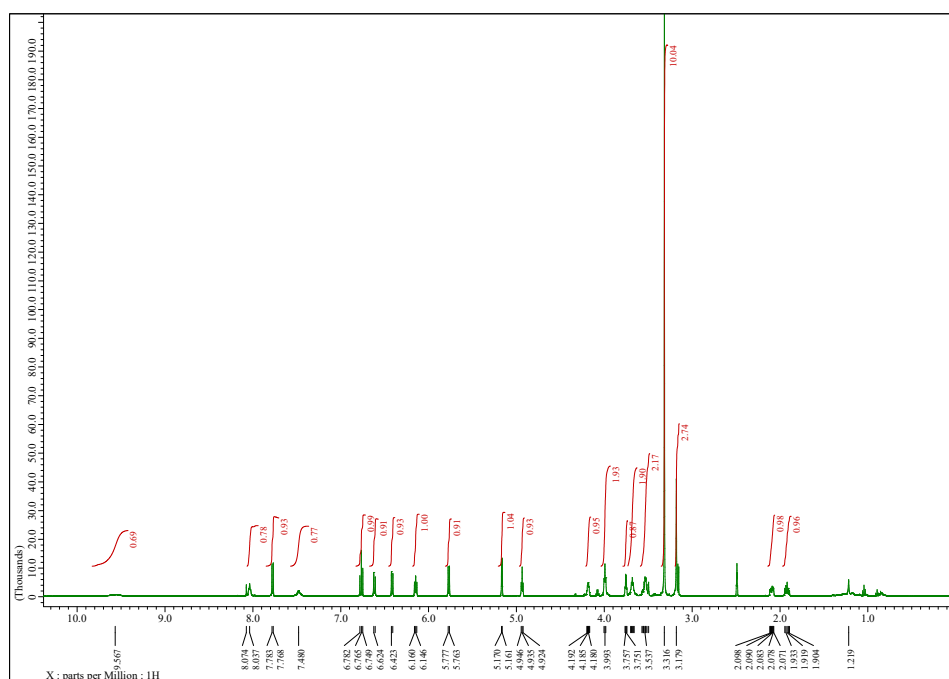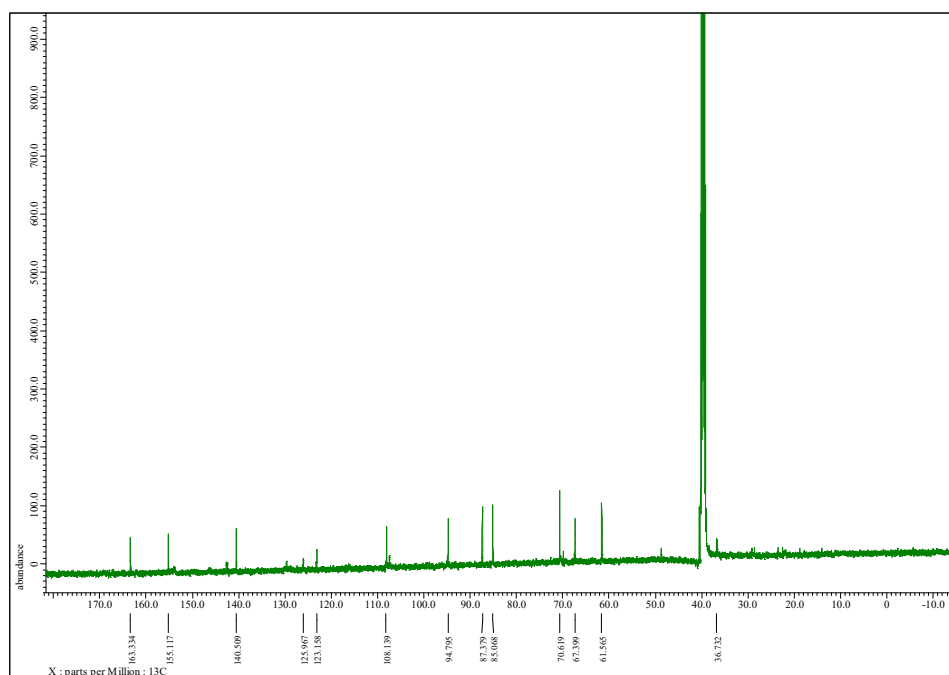

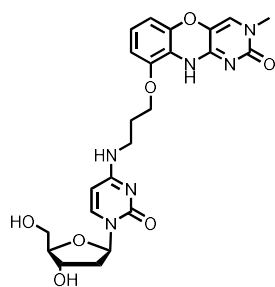

Compound 4

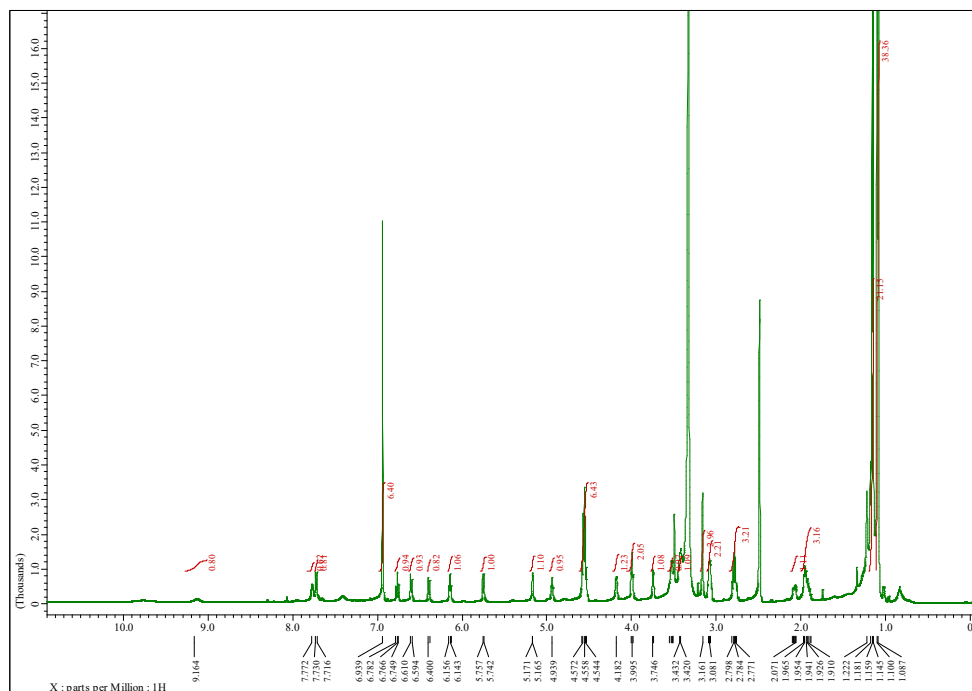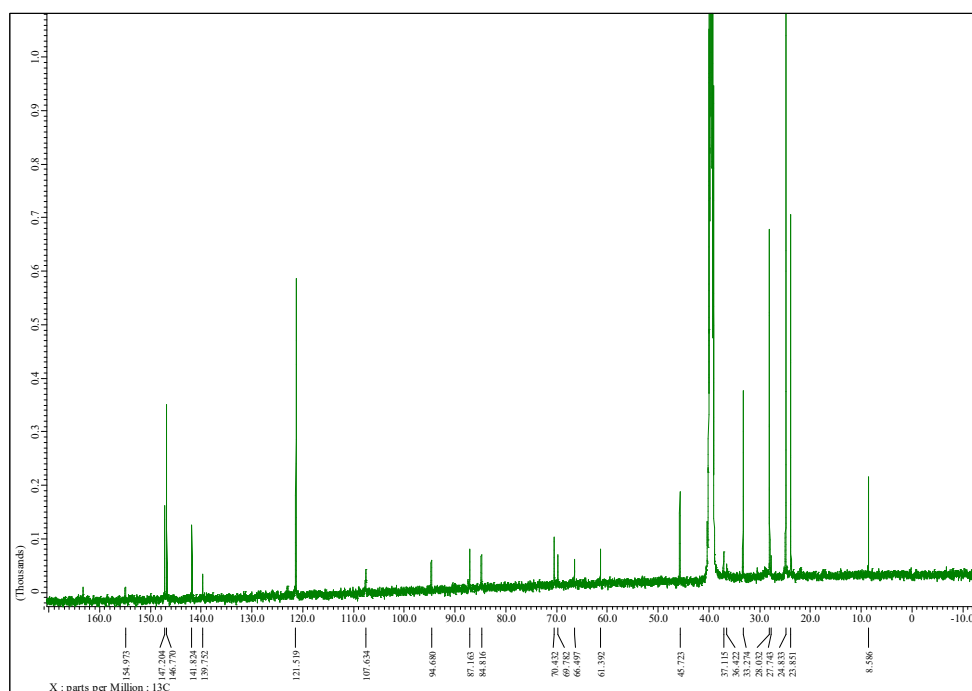

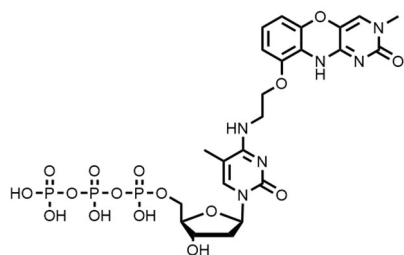

Compound 17

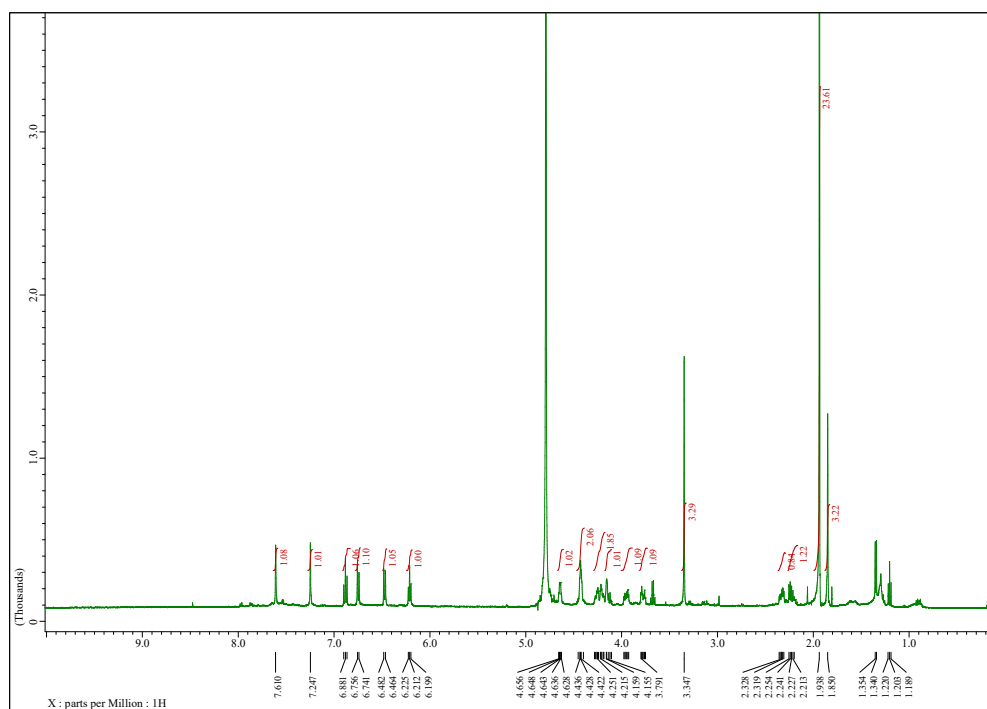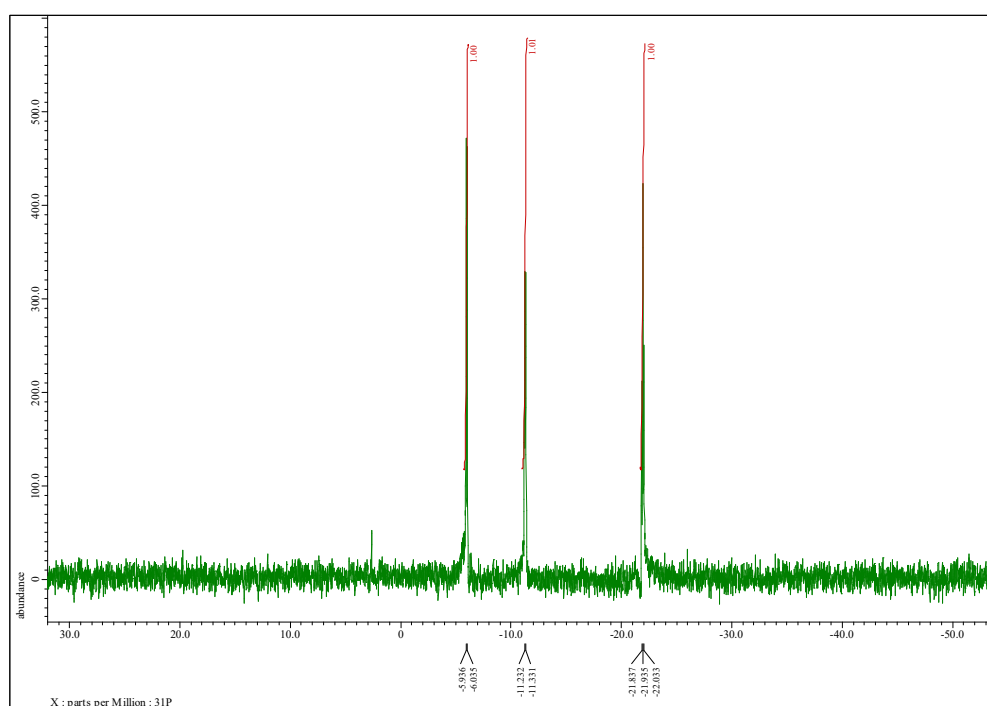

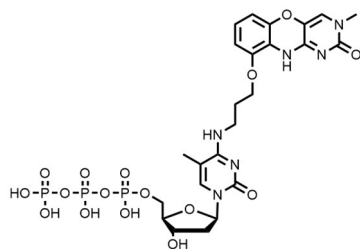

Compound 18

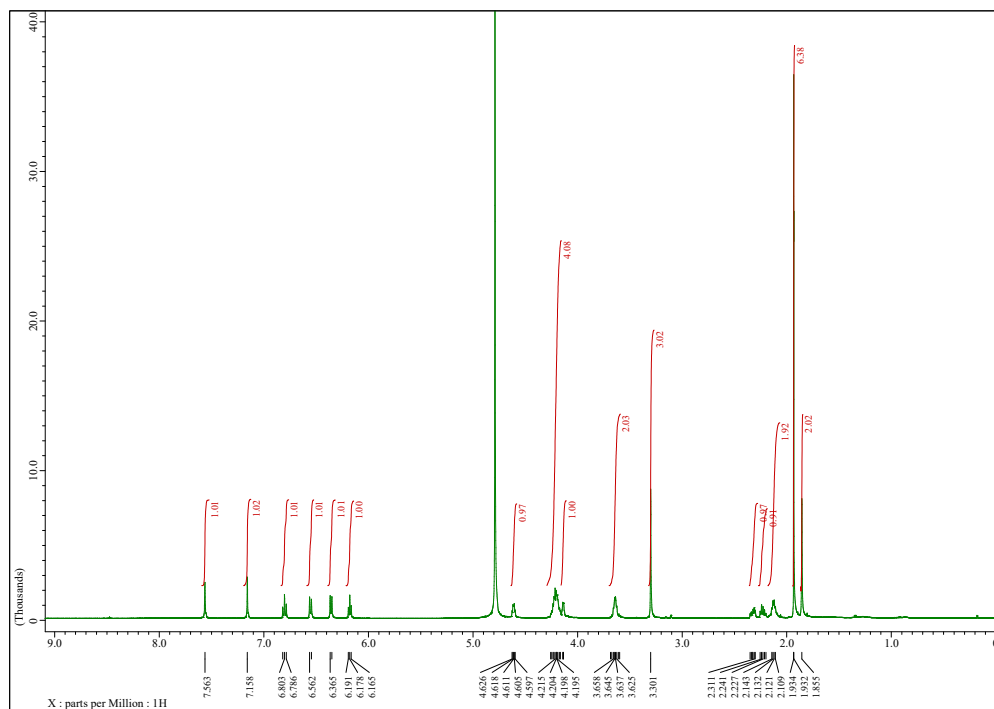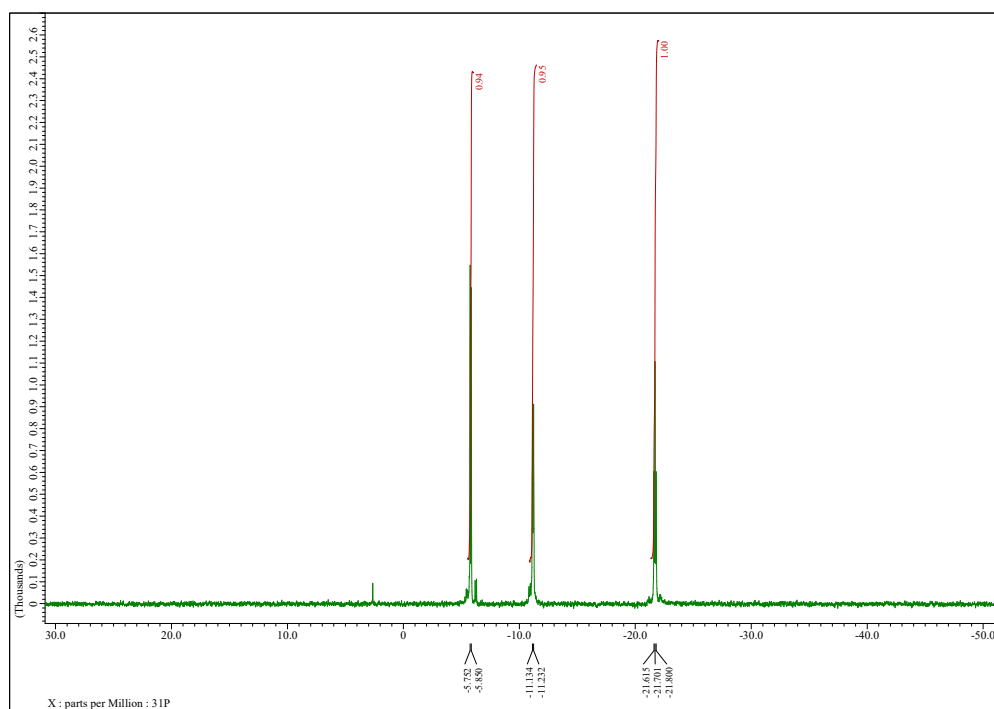

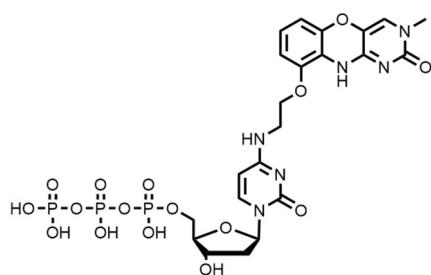

Compound 19

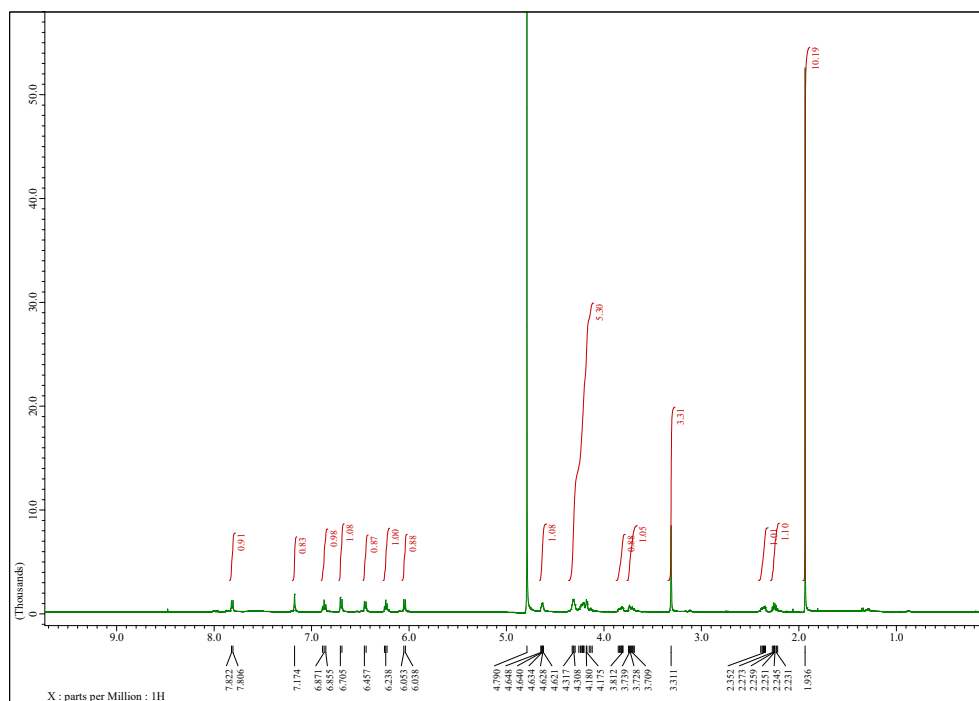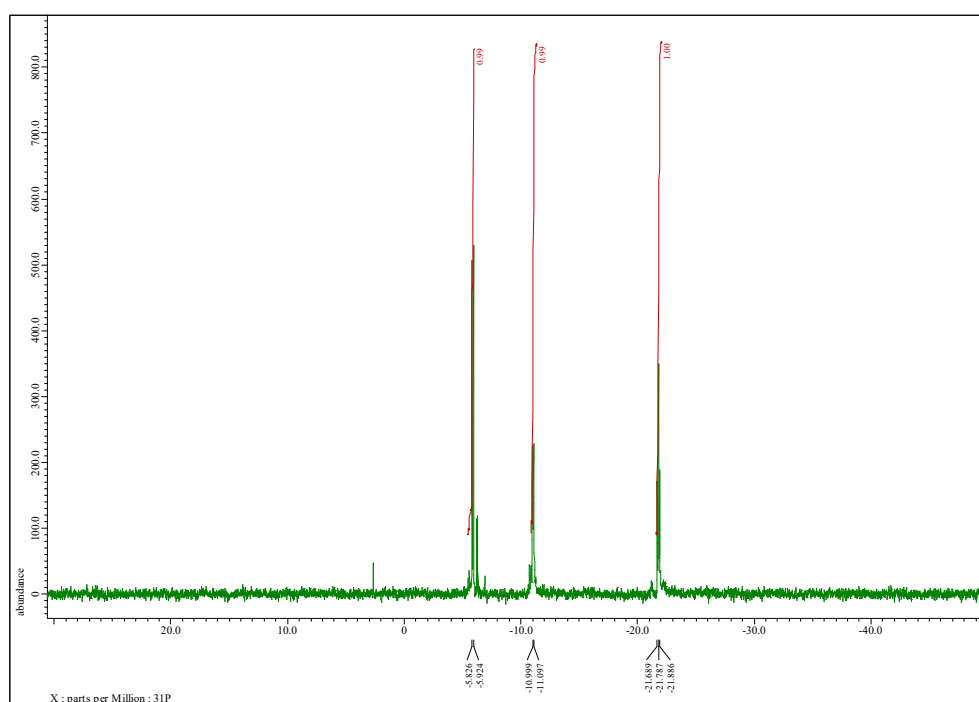

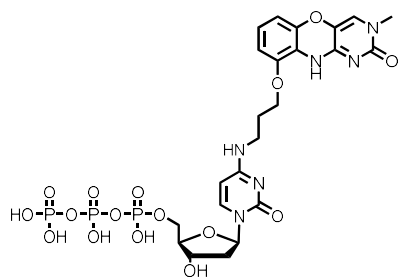

Compound 20

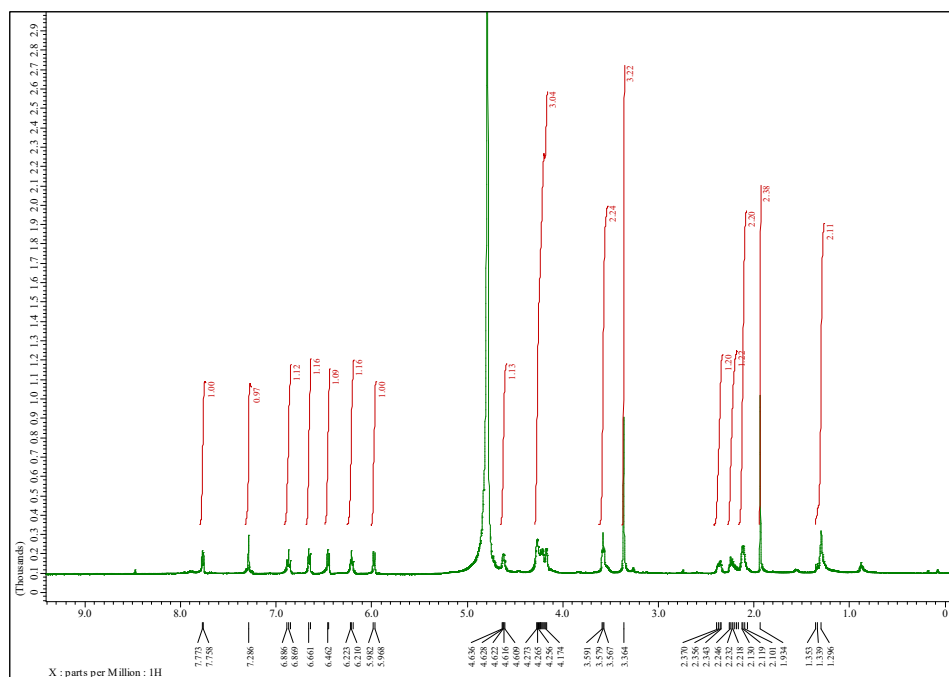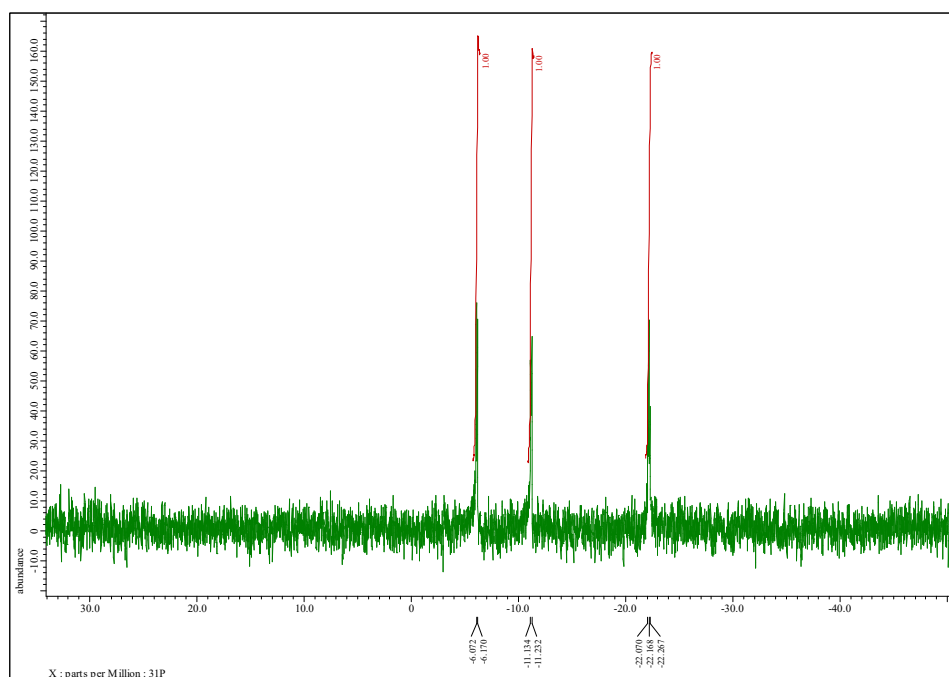

Supplement: s1 [file s1]
